# Supplementary material
Source: HighWire-hosted journal article supplement (https://ard.bmj.com/content/80/5/566)
Supplement: inline-supplementary-material-1 [file inline-supplementary-material-1.pdf]

**Supplementary Material**

Supplementary Table 1: Diagnostic codes for diabetes.

|               |
|---------------|
| <b>ICD-9</b>  |
| 250.X         |
| <b>ICD-10</b> |
| E11.X         |
| E08.X         |
| E09.X         |
| E13.X         |

Supplementary Table 2: Correlation between cytokine/chemokine assays.

| Analyte     | Eotaxin   | GM-CSF    | IFN-g     | IL-10    | IL-12 (p70) | IL-13     | IL-15     | IL-16     | IL-17A    | IL-1 RA   | IL-1a     | IL-1B     |
|-------------|-----------|-----------|-----------|----------|-------------|-----------|-----------|-----------|-----------|-----------|-----------|-----------|
| Eotaxin     | 1         |           |           |          |             |           |           |           |           |           |           |           |
| GM-CSF      | 0.150***  | 1         |           |          |             |           |           |           |           |           |           |           |
| IFN-g       | 0.492***  | 0.476***  | 1         |          |             |           |           |           |           |           |           |           |
| IL-10       | 0.530***  | 0.438***  | 0.682***  | 1        |             |           |           |           |           |           |           |           |
| IL-12 (p70) | 0.293***  | 0.495***  | 0.545***  | 0.496*** | 1           |           |           |           |           |           |           |           |
| IL-13       | 0.322***  | 0.533***  | 0.497***  | 0.554*** | 0.665***    | 1         |           |           |           |           |           |           |
| IL-15       | 0.298***  | 0.235***  | 0.429***  | 0.439*** | 0.260***    | 0.270***  | 1         |           |           |           |           |           |
| IL-16       | 0.594***  | 0.238***  | 0.617***  | 0.689*** | 0.360***    | 0.385***  | 0.481***  | 1         |           |           |           |           |
| IL-17A      | 0.300***  | 0.267***  | 0.330***  | 0.349*** | 0.287***    | 0.262***  | 0.282***  | 0.262***  | 1         |           |           |           |
| IL-1 RA     | 0.319***  | 0.290***  | 0.282***  | 0.383*** | 0.281***    | 0.361***  | 0.197***  | 0.161***  | 0.222***  | 1         |           |           |
| IL-1a       | 0.0629*** | 0.375***  | 0.182***  | 0.230*** | 0.289***    | 0.341***  | 0.132***  | 0.0197**  | 0.200***  | 0.337***  | 1         |           |
| IL-1B       | 0.0479*** | 0.474***  | 0.268***  | 0.328*** | 0.306***    | 0.526***  | 0.180***  | 0.0967*** | 0.170***  | 0.467***  | 0.540***  | 1         |
| IL-2        | 0.361***  | 0.419***  | 0.489***  | 0.562*** | 0.405***    | 0.536***  | 0.299***  | 0.435***  | 0.255***  | 0.318***  | 0.332***  | 0.473***  |
| IL-23       | 0.0718*** | 0.200***  | 0.127***  | 0.126*** | 0.144***    | 0.149***  | 0.197***  | 0.0882*** | 0.0464*** | 0.0237*** | 0.188***  | 0.223***  |
| IL-27       | 0.559***  | 0.194***  | 0.577***  | 0.634*** | 0.342***    | 0.324***  | 0.442***  | 0.858***  | 0.239***  | 0.0812*** | -0.00170  | 0.0401*** |
| IL-3        | 0.134***  | 0.353***  | 0.284***  | 0.261*** | 0.293***    | 0.230***  | 0.184***  | 0.121***  | 0.189***  | 0.247***  | 0.182***  | 0.180***  |
| IL-4        | 0.293***  | 0.468***  | 0.492***  | 0.481*** | 0.575***    | 0.507***  | 0.198***  | 0.322***  | 0.264***  | 0.358***  | 0.297***  | 0.354***  |
| IL-5        | 0.126***  | 0.479***  | 0.424***  | 0.361*** | 0.346***    | 0.337***  | 0.309***  | 0.283***  | 0.333***  | 0.135***  | 0.194***  | 0.227***  |
| IL-6        | 0.471***  | 0.458***  | 0.580***  | 0.702*** | 0.495***    | 0.545***  | 0.469***  | 0.633***  | 0.264***  | 0.475***  | 0.306***  | 0.438***  |
| IL-7        | 0.524***  | 0.170***  | 0.564***  | 0.600*** | 0.283***    | 0.280***  | 0.556***  | 0.842***  | 0.291***  | 0.0247*** | -0.00535  | -0.0116   |
| IL-8        | 0.479***  | 0.407***  | 0.507***  | 0.626*** | 0.377***    | 0.595***  | 0.410***  | 0.611***  | 0.276***  | 0.406***  | 0.267***  | 0.543***  |
| IL-9        | 0.415***  | 0.220***  | 0.454***  | 0.417*** | 0.314***    | 0.270***  | 0.325***  | 0.494***  | 0.257***  | 0.204***  | 0.106***  | 0.141***  |
| MCP-1       | 0.541***  | 0.224***  | 0.585***  | 0.659*** | 0.344***    | 0.356***  | 0.545***  | 0.827***  | 0.284***  | 0.175***  | 0.0548*** | 0.0846*** |
| MCP-4       | 0.617***  | 0.195***  | 0.573***  | 0.629*** | 0.334***    | 0.344***  | 0.421***  | 0.849***  | 0.274***  | 0.101***  | 0.0401*** | 0.0582*** |
| MDC         | 0.523***  | 0.205***  | 0.569***  | 0.639*** | 0.325***    | 0.338***  | 0.556***  | 0.845***  | 0.277***  | 0.0687*** | 0.0359*** | 0.0569*** |
| MIP-1a      | 0.490***  | 0.427***  | 0.461***  | 0.589*** | 0.415***    | 0.545***  | 0.237***  | 0.482***  | 0.252***  | 0.423***  | 0.295***  | 0.471***  |
| MIP-1B      | 0.607***  | 0.301***  | 0.593***  | 0.732*** | 0.423***    | 0.472***  | 0.450***  | 0.791***  | 0.316***  | 0.325***  | 0.171***  | 0.225***  |
| MIP-3a      | 0.439***  | 0.314***  | 0.549***  | 0.611*** | 0.406***    | 0.405***  | 0.468***  | 0.686***  | 0.287***  | 0.235***  | 0.176***  | 0.215***  |
| TNF-a       | 0.527***  | 0.406***  | 0.600***  | 0.637*** | 0.441***    | 0.496***  | 0.410***  | 0.597***  | 0.369***  | 0.319***  | 0.183***  | 0.279***  |
| VEGF        | 0.332***  | 0.242***  | 0.361***  | 0.395*** | 0.267***    | 0.286***  | 0.402***  | 0.429***  | 0.111***  | 0.381***  | 0.114***  | 0.214***  |
| hsCRP       | 0.0551*** | 0.0859*** | 0.0689*** | 0.106*** | 0.0598***   | 0.0529*** | 0.0867*** | 0.0497*** | 0.108***  | 0.252***  | 0.0371*** | 0.0603*** |

| Analyte     | IL-2      | IL-23      | IL-27     | IL-3      | IL-4      | IL-5     | IL-6     | IL-7      | IL-8      | IL-9      | MCP-1     | MCP-4     |
|-------------|-----------|------------|-----------|-----------|-----------|----------|----------|-----------|-----------|-----------|-----------|-----------|
| Eotaxin     |           |            |           |           |           |          |          |           |           |           |           |           |
| GM-CSF      |           |            |           |           |           |          |          |           |           |           |           |           |
| IFN-g       |           |            |           |           |           |          |          |           |           |           |           |           |
| IL-10       |           |            |           |           |           |          |          |           |           |           |           |           |
| IL-12 (p70) |           |            |           |           |           |          |          |           |           |           |           |           |
| IL-13       |           |            |           |           |           |          |          |           |           |           |           |           |
| IL-15       |           |            |           |           |           |          |          |           |           |           |           |           |
| IL-16       |           |            |           |           |           |          |          |           |           |           |           |           |
| IL-17A      |           |            |           |           |           |          |          |           |           |           |           |           |
| IL-1 RA     |           |            |           |           |           |          |          |           |           |           |           |           |
| IL-1a       |           |            |           |           |           |          |          |           |           |           |           |           |
| IL-1B       |           |            |           |           |           |          |          |           |           |           |           |           |
| IL-2        | 1         |            |           |           |           |          |          |           |           |           |           |           |
| IL-23       | 0.242***  | 1          |           |           |           |          |          |           |           |           |           |           |
| IL-27       | 0.400***  | 0.127***   | 1         |           |           |          |          |           |           |           |           |           |
| IL-3        | 0.187***  | 0.133***   | 0.139***  | 1         |           |          |          |           |           |           |           |           |
| IL-4        | 0.380***  | 0.0590***  | 0.287***  | 0.201***  | 1         |          |          |           |           |           |           |           |
| IL-5        | 0.274***  | 0.138***   | 0.263***  | 0.276***  | 0.254***  | 1        |          |           |           |           |           |           |
| IL-6        | 0.552***  | 0.120***   | 0.566***  | 0.203***  | 0.557***  | 0.283*** | 1        |           |           |           |           |           |
| IL-7        | 0.365***  | 0.109***   | 0.816***  | 0.0906*** | 0.223***  | 0.276*** | 0.547*** | 1         |           |           |           |           |
| IL-8        | 0.600***  | 0.122***   | 0.506***  | 0.106***  | 0.416***  | 0.244*** | 0.700*** | 0.504***  | 1         |           |           |           |
| IL-9        | 0.304***  | 0.114***   | 0.492***  | 0.156***  | 0.285***  | 0.256*** | 0.444*** | 0.505***  | 0.404***  | 1         |           |           |
| MCP-1       | 0.432***  | 0.121***   | 0.808***  | 0.0965*** | 0.316***  | 0.290*** | 0.629*** | 0.828***  | 0.597***  | 0.521***  | 1         |           |
| MCP-4       | 0.419***  | 0.121***   | 0.847***  | 0.0980*** | 0.327***  | 0.278*** | 0.579*** | 0.832***  | 0.570***  | 0.505***  | 0.853***  | 1         |
| MDC         | 0.408***  | 0.152***   | 0.822***  | 0.0881*** | 0.272***  | 0.291*** | 0.613*** | 0.864***  | 0.574***  | 0.523***  | 0.893***  | 0.889***  |
| MIP-1a      | 0.540***  | 0.126***   | 0.422***  | 0.186***  | 0.474***  | 0.204*** | 0.678*** | 0.367***  | 0.673***  | 0.360***  | 0.447***  | 0.483***  |
| MIP-1B      | 0.493***  | 0.1000***  | 0.743***  | 0.150***  | 0.438***  | 0.256*** | 0.739*** | 0.731***  | 0.690***  | 0.499***  | 0.795***  | 0.784***  |
| MIP-3a      | 0.451***  | 0.129***   | 0.683***  | 0.199***  | 0.337***  | 0.289*** | 0.635*** | 0.641***  | 0.526***  | 0.442***  | 0.658***  | 0.645***  |
| TNF-a       | 0.449***  | 0.0835***  | 0.550***  | 0.232***  | 0.408***  | 0.309*** | 0.583*** | 0.515***  | 0.560***  | 0.406***  | 0.572***  | 0.564***  |
| VEGF        | 0.278***  | 0.0179***  | 0.376***  | 0.167***  | 0.323***  | 0.228*** | 0.555*** | 0.413***  | 0.461***  | 0.342***  | 0.427***  | 0.386***  |
| hsCRP       | 0.0389*** | -0.0496*** | 0.0513*** | 0.118***  | 0.0812*** | 0.183*** | 0.235*** | 0.0635*** | 0.0735*** | 0.0745*** | 0.0509*** | 0.0330*** |

| Analyte     | MDC       | MIP-1a    | MIP-1B    | MIP-3a   | TNF-a     | VEGF     | Hs-CRP |
|-------------|-----------|-----------|-----------|----------|-----------|----------|--------|
| Eotaxin     |           |           |           |          |           |          |        |
| GM-CSF      |           |           |           |          |           |          |        |
| IFN-g       |           |           |           |          |           |          |        |
| IL-10       |           |           |           |          |           |          |        |
| IL-12 (p70) |           |           |           |          |           |          |        |
| IL-13       |           |           |           |          |           |          |        |
| IL-15       |           |           |           |          |           |          |        |
| IL-16       |           |           |           |          |           |          |        |
| IL-17A      |           |           |           |          |           |          |        |
| IL-1 RA     |           |           |           |          |           |          |        |
| IL-1a       |           |           |           |          |           |          |        |
| IL-1B       |           |           |           |          |           |          |        |
| IL-2        |           |           |           |          |           |          |        |
| IL-23       |           |           |           |          |           |          |        |
| IL-27       |           |           |           |          |           |          |        |
| IL-3        |           |           |           |          |           |          |        |
| IL-4        |           |           |           |          |           |          |        |
| IL-5        |           |           |           |          |           |          |        |
| IL-6        |           |           |           |          |           |          |        |
| IL-7        |           |           |           |          |           |          |        |
| IL-8        |           |           |           |          |           |          |        |
| IL-9        |           |           |           |          |           |          |        |
| MCP-1       |           |           |           |          |           |          |        |
| MCP-4       |           |           |           |          |           |          |        |
| MDC         | 1         |           |           |          |           |          |        |
| MIP-1a      | 0.433***  | 1         |           |          |           |          |        |
| MIP-1B      | 0.789***  | 0.699***  | 1         |          |           |          |        |
| MIP-3a      | 0.691***  | 0.494***  | 0.676***  | 1        |           |          |        |
| TNF-a       | 0.556***  | 0.527***  | 0.625***  | 0.549*** | 1         |          |        |
| VEGF        | 0.418***  | 0.346***  | 0.459***  | 0.438*** | 0.398***  | 1        |        |
| hsCRP       | 0.0287*** | 0.0654*** | 0.0686*** | 0.115*** | 0.0333*** | 0.254*** | 1      |

\* p < 0.05, \*\* p < 0.01, \*\*\* p < 0.001

Supplementary Figure 1: Adjusted Hazard Ratios for the risk of incident diabetes among patients with rheumatoid arthritis and no history of diabetes (N=1,635, Events=119) by individual cytokine concentrations (per 1 SD) measured on banked serum from enrollment; each analyte examined in a separate model adjusting for age, sex, race, current smoking, baseline body mass index, DAS28(CRP), and baseline use of methotrexate, TNF-biologics, and prednisone (each estimate and confidence interval represents a separate model).

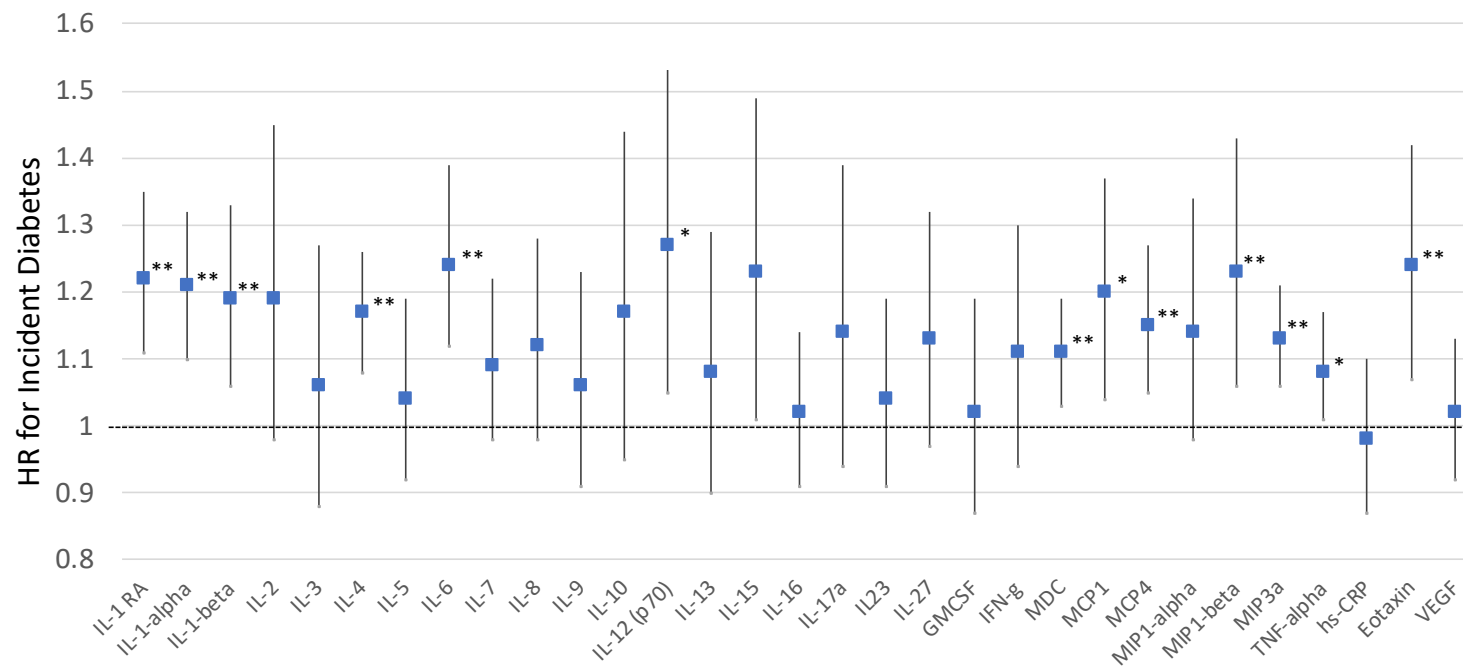

Abbreviations: IL= Interleukin; GMCSF= Granulocyte Macrophage Colony Stimulating Factor; IFN= Interferon; MCP= Monocyte Chemoattractant Protein; MIP=Macrophage Inflammatory Protein; VEGF= Vascular Endothelial Growth Factor; TNF= Tumor Necrosis Factor

\*p<0.05

\*\*p<0.008 (Simes-Benjamini-Hochberg adjustment for multiple comparisons)

Abbreviations: IL= Interleukin; GMCSF= Granulocyte Macrophage Colony Stimulating Factor; IFN= Interferon; MDC= Macrophage Derived Chemokine; MCP= Macrophage Chemoattractant Protein; MIP=Macrophage Inflammatory Protein; VEGF= Vascular Endothelial Growth Factor; hs-CRP= high-sensitivity C-Reactive Protein; TNF= Tumor Necrosis Factor
